# Supplementary material for: Impact of Motivational Enhanced Adherence Counseling and Point-of-Care Viral Load Monitoring on Viral Load Outcome in Women on Life-Long ART: A Randomized Pilot Study
Source: AIDS Res Treat. 2022 Sep 5;2022:4887202. doi: 10.1155/2022/4887202 (PMC9467808; doi:10.1155/2022/4887202)
Supplement: Supplementary Materials — Supplementary 1: PROMOTE study design. Supplementary 2: table of factors associated with viral suppression at month 6. Supplementary 3: table of factors associated with viral suppression at month 12. [file 4887202.f1.zip]

Archive with 3 entries (3 files):
- Supplementary 1 - PROMOTE Study Design.pdf
- Supplementary 2 - Table of factors associated with viral suppression at month 6 (1).docx
- Supplementary 3 - Table of factors associated with viral suppression at month 12 (1).docx
